# Supplementary material for: Defense-Related Gene Expression Following an Orthotospovirus Infection Is Influenced by Host Resistance in Arachis hypogaea
Source: MDPI journal article supplement (doi:10.3390/v13071303), 2021-07-05
Supplement: s1 [file s1]

### Supplementary Materials

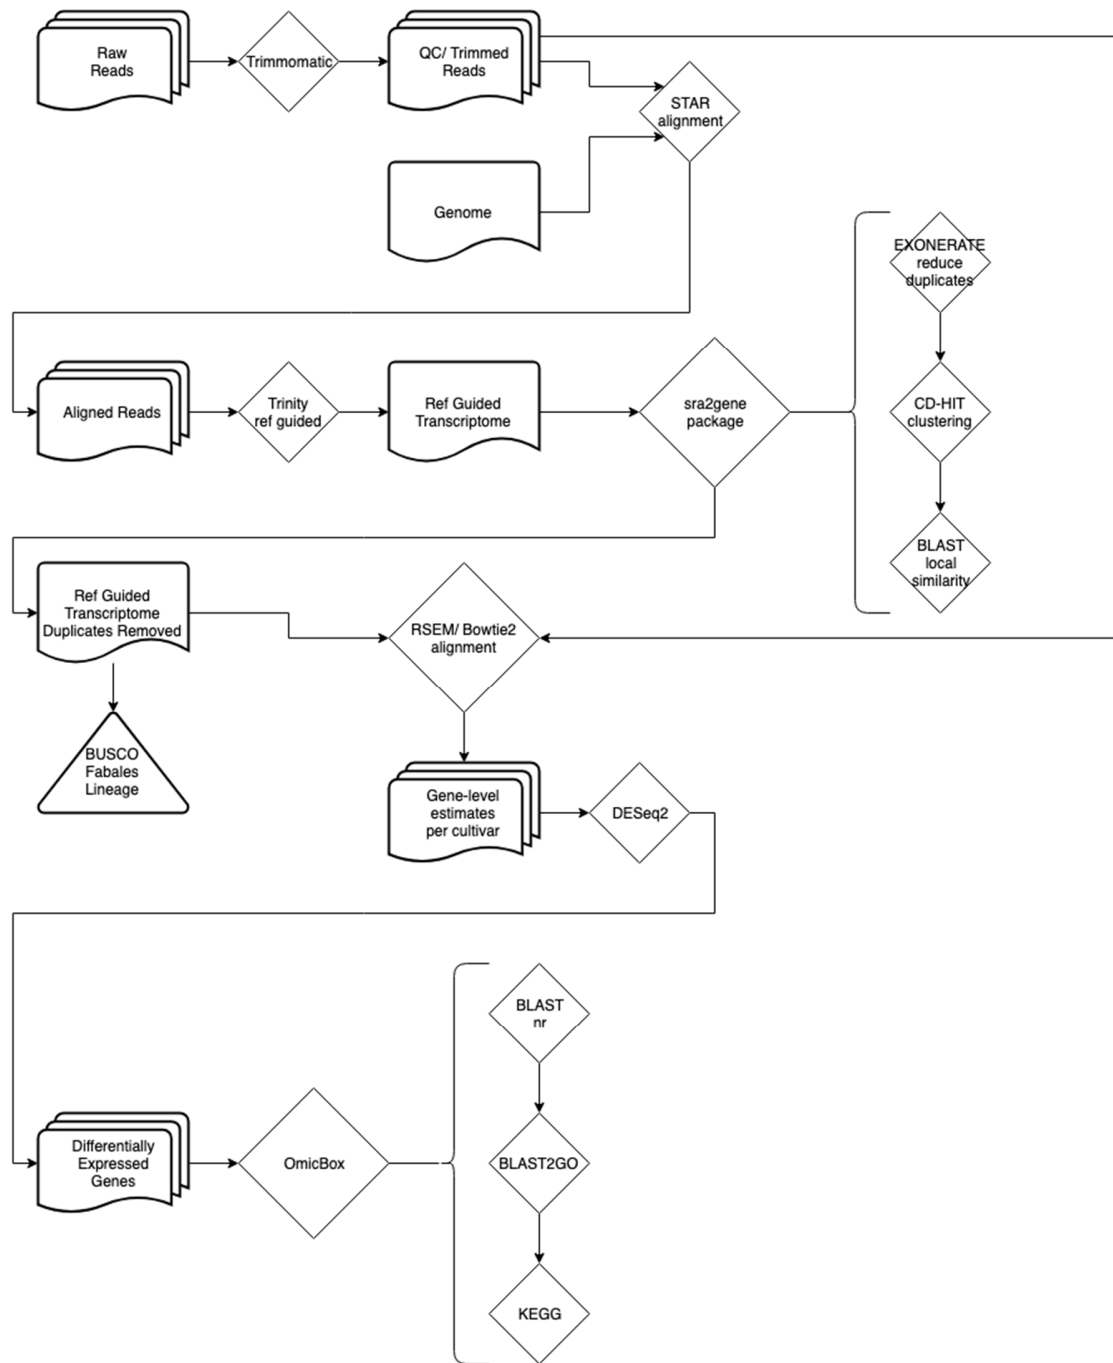

**Fig S1. Pipeline for transcriptome assembly.** Pipeline for assembly and differential expression analysis. Using the gene models and full allotetraploid genome, this transcriptome assembly incorporated two previously uninculcated cultivars. Mapping of raw reads and raw read counts was performed to calculate the levels of expression in non-infected and TSWV-infected peanut plants.

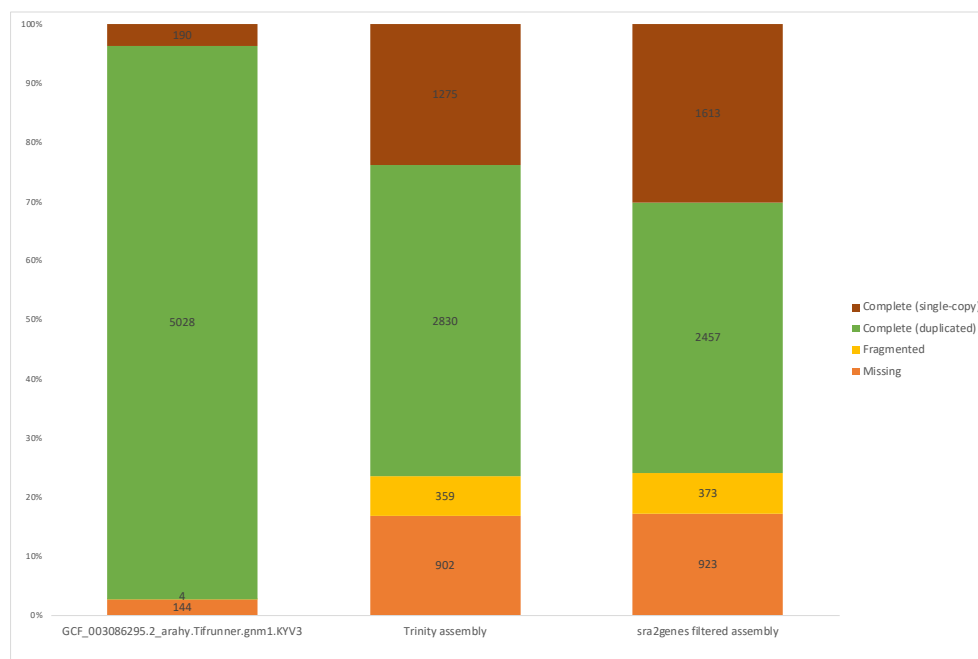

**Fig. S2. BUSCO scores from current transcriptome assembly compared to gene models.** The total completeness of the transcriptome assembly was checked against the Fabales Odb10 lineage. The total number of complete BUSCOs was 4,070, missing BUSCOs is 923, and fragmented BUSCOs was 373. Of the 4,070 complete BUSCOs, 2,457 were duplicated and 1,613 were single-copy.

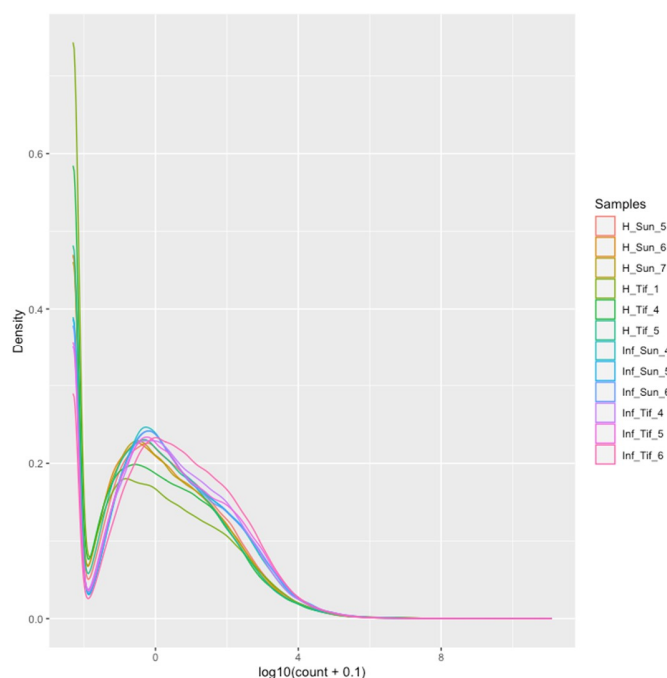

**Fig. S3. FPKM across all samples in both cultivars.** FPKM of the total number of reads from each sample. Overall sample FPKM was consistent and there were no outliers. Non-infected (H) and infected (I) samples for SunOleic 97R (Sun) and Tifguard (Tif).

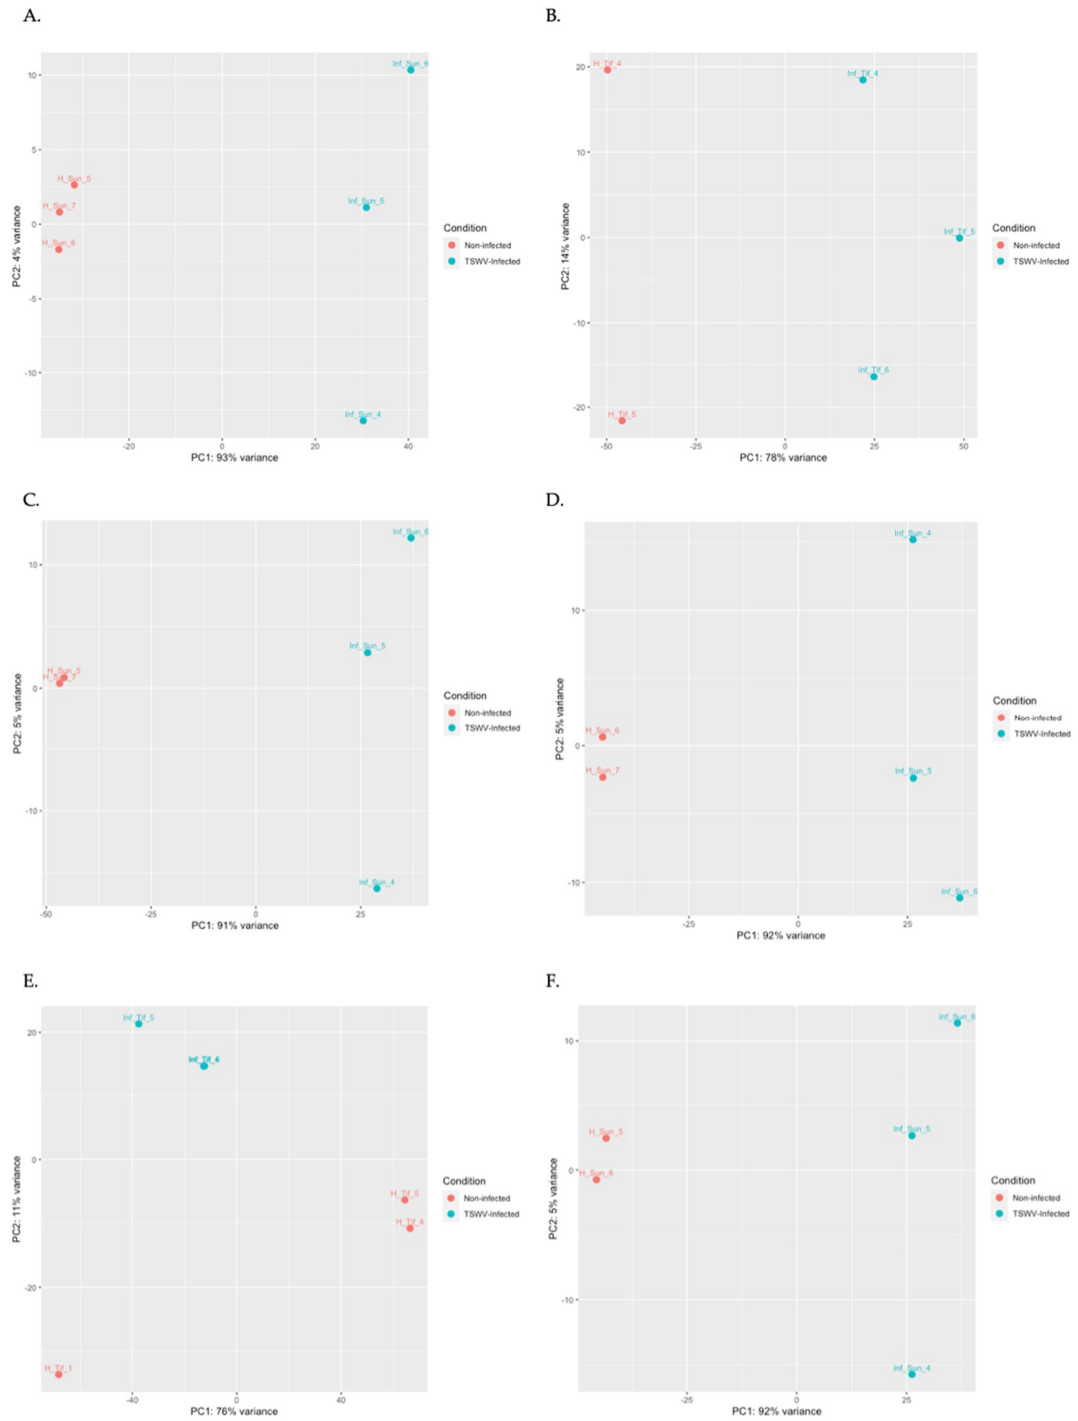

**Fig. S4. Comparisons of selective removal of samples to test effects on clustering.** Comparisons were conducted to check for stability of sample clustering. (A) SunOleic 97R PCA shows that all samples cluster according to being either healthy or TSWV-infected. (B - D) The removal of one sample from the SunOleic set did not disrupt the clustering of samples. (E) Tifguard PCA with H\_Tif\_1 included showed poor clustering. (F) The removal of Non-inf\_Tif\_1 resolves potential confounding effects introduced by the inclusion of H-Tif\_1.

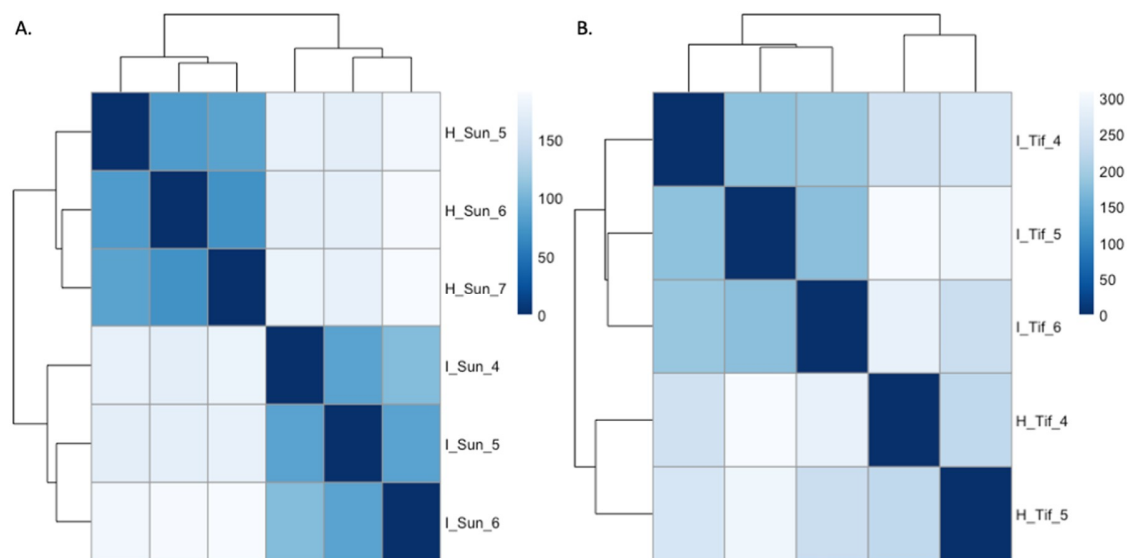

**Fig. S5. Sample-to-sample relation within cultivars.** Sample-to-sample distances for the SunOleic 97R and Tifguard cultivars, respectively. (A) Samples showed stronger relation to each other based on being either non-infected or TSWV-infected for the SunOleic cultivar. (B) In the Tifguard cultivar, these samples also showed stronger relation to each other based on being either non-infected or TSWV-infected.

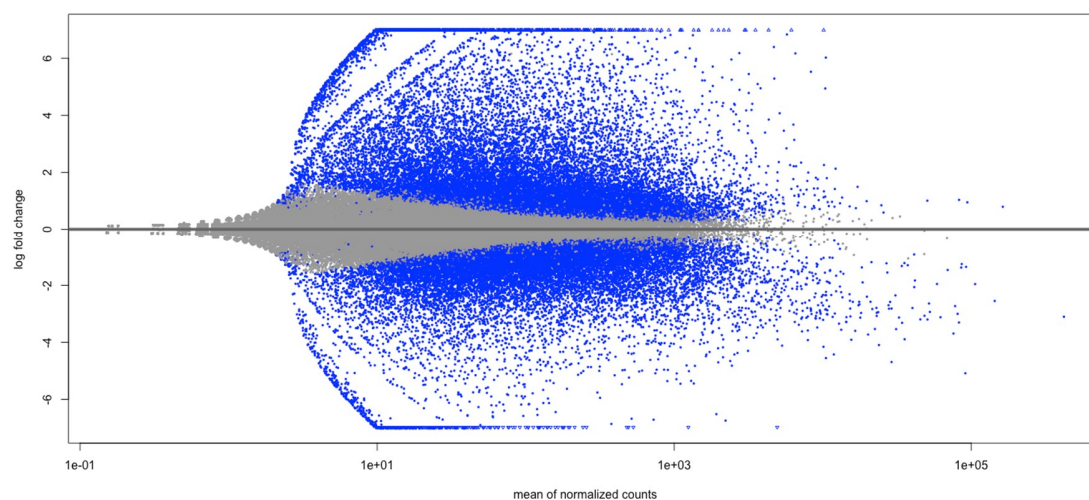

**Fig. S6. MA plot for SunOleic 97R.** SunOleic 97R MA-plot detailing the separation of differentially expressed genes with a p-value  $\leq 0.001$  and  $\log_2FC \geq 4$ .

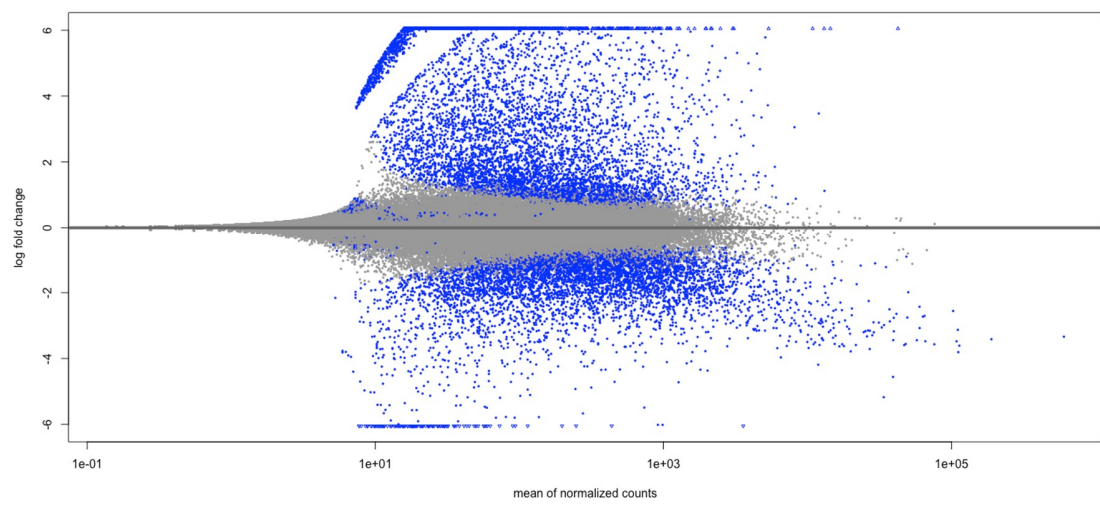

**Fig. S7. MA plot for Tifguard.** Tifguard MA-plot detailing the separation of differentially expressed genes with a p-value  $\leq 0.001$  and  $\log_2FC \geq 4$ .

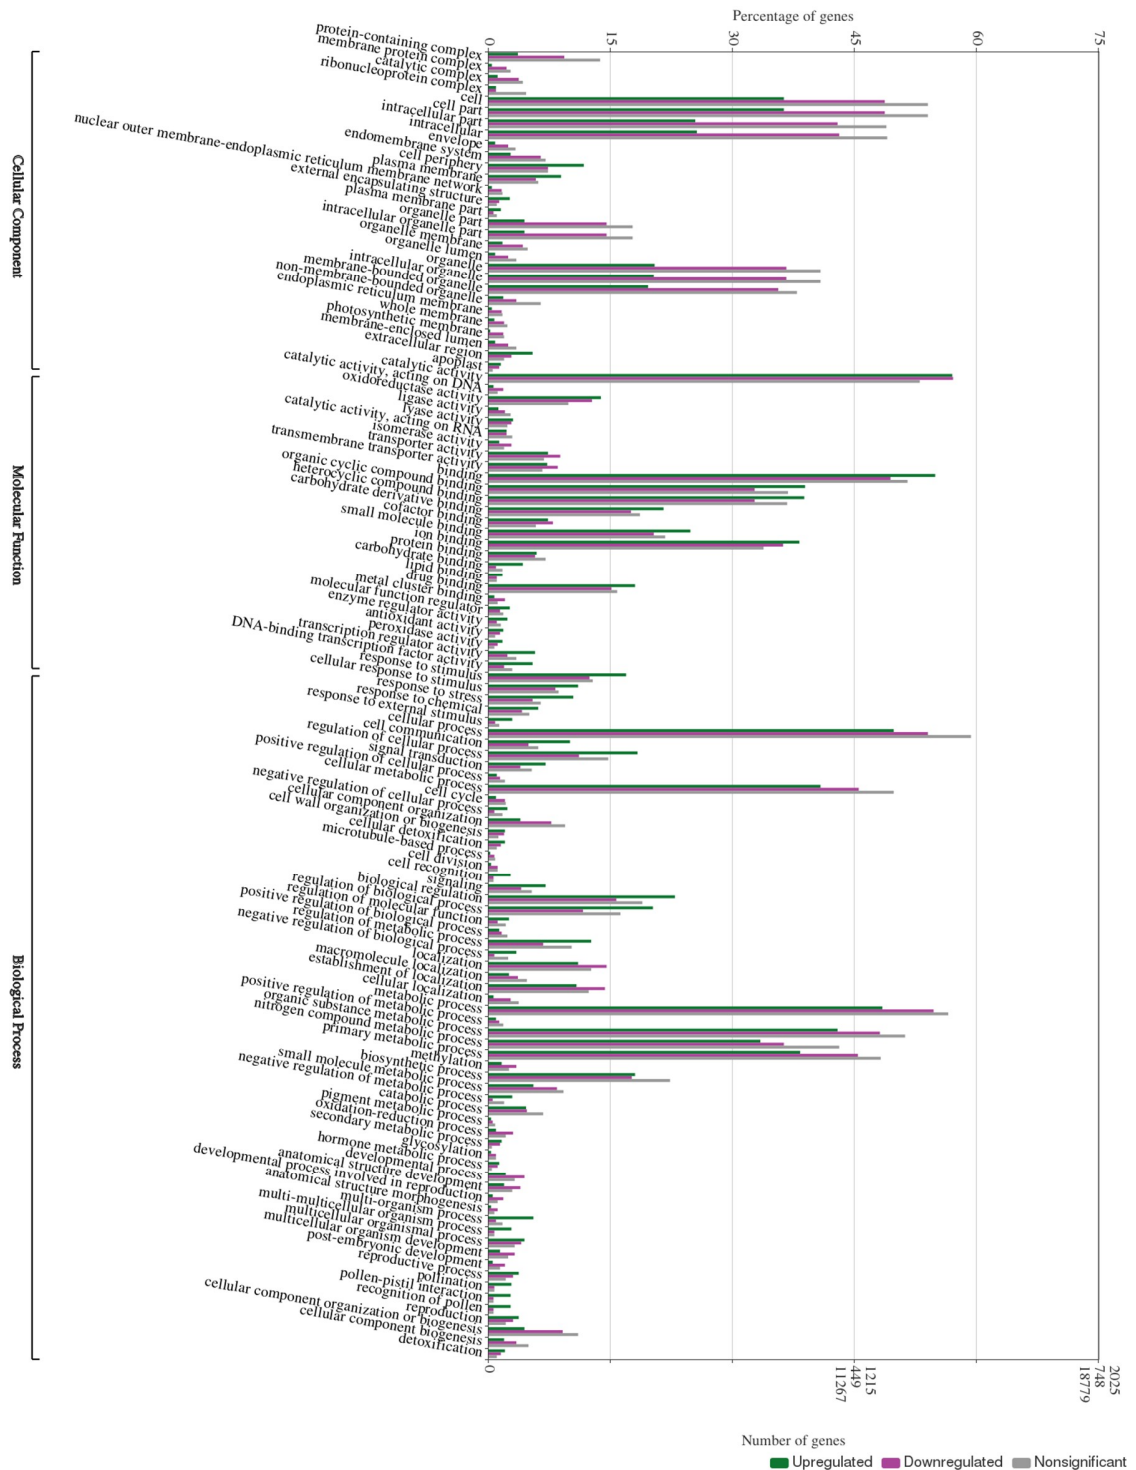

**Fig. S8. SunOleic 97R GO terms.** Gene Ontology (GO) terms assigned to differentially expressed genes (DEGs) that were upregulated and downregulated for the SunOleic 97R cultivar. Distribution of all significant level 2 & 3 GO terms present in this SunOleic 97R. Non-significant DEGs were included for comparison.

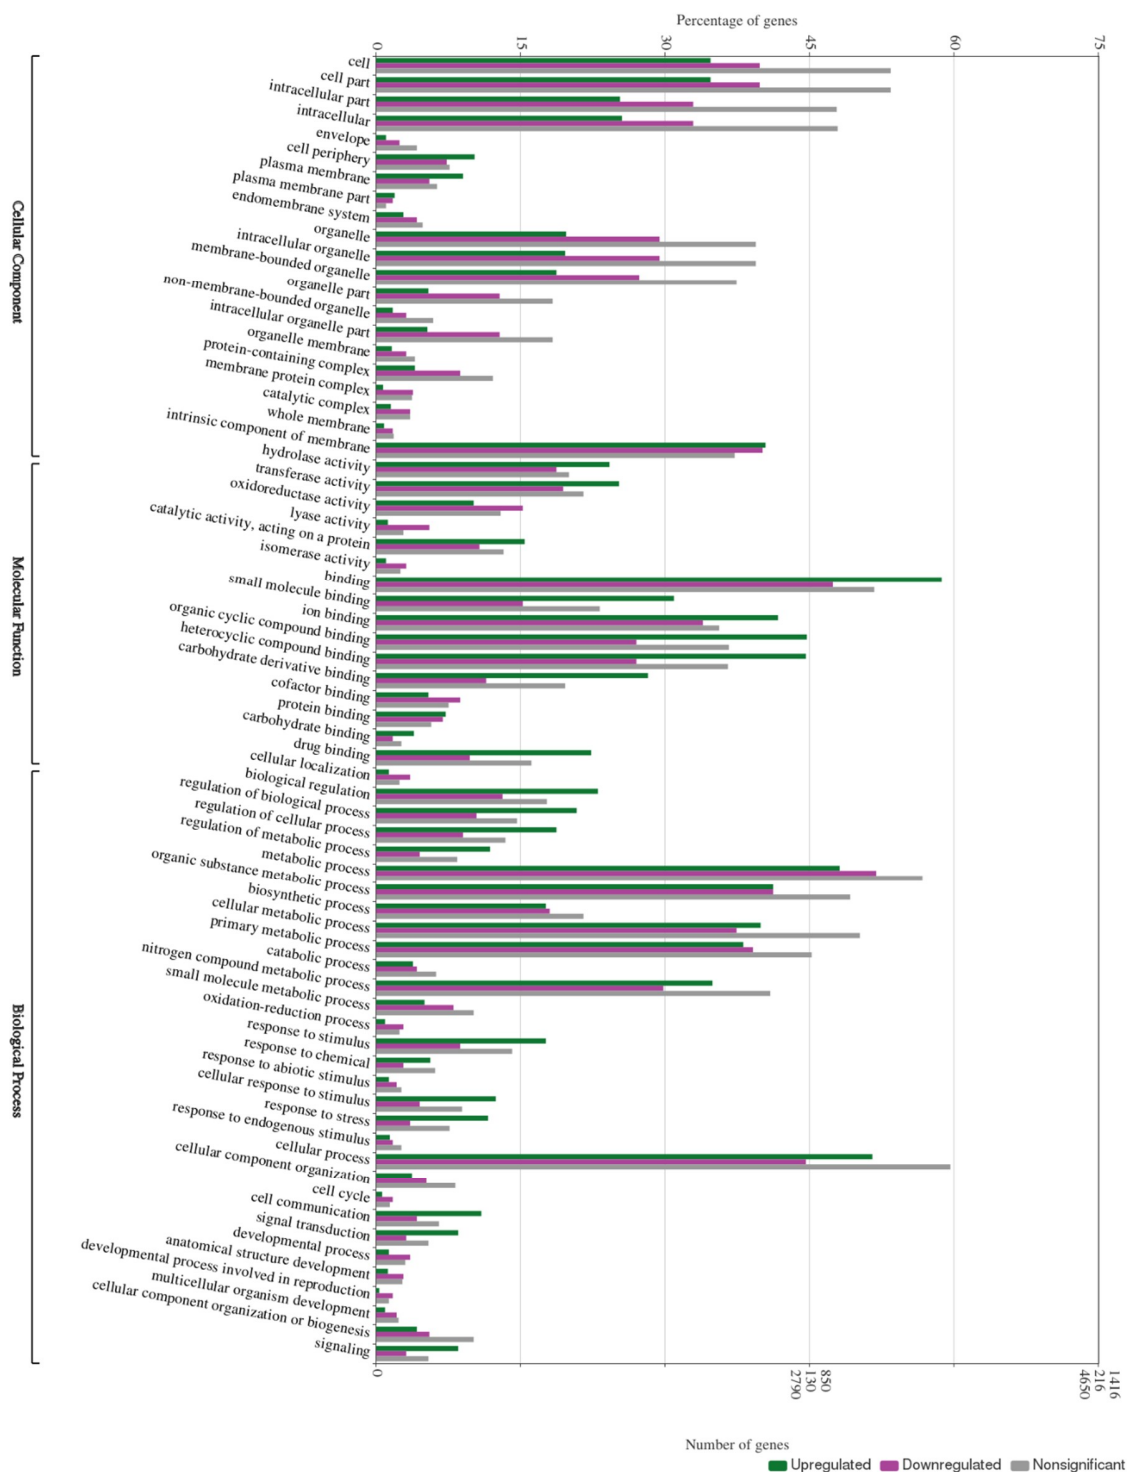

**Fig. S9. Tifguard GO terms.** Gene Ontology (GO) terms assigned to differentially expressed genes (DEGs) that were upregulated and downregulated for the Tifguard cultivar. Distribution of all significant level 2 & 3 GO terms present in this Tifguard. Non-significant DEGs were included for comparison.

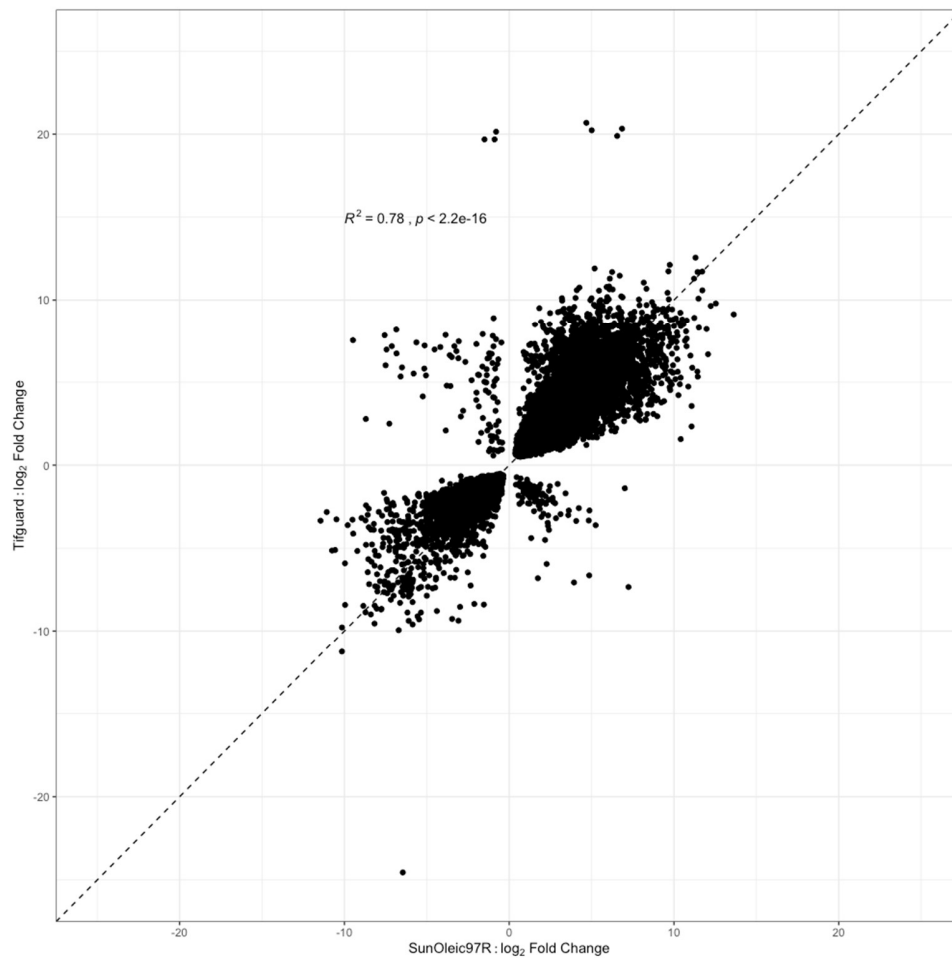

**Fig. S10. Correlation of all DEGs between both cultivars.** Pearson's correlation of all significant DEGs present in both cultivars.  $R^2 = 0.78$  when considering all DEGs.

**Table S1. DEG results from testing selective removal of samples.** Total DEGs from selective removal of various samples. SunOleic 97R maintains stability after the selective removal of individual non-infected samples. Tifguard had a drop in total DEGs with the inclusion of a potentially confounded sample, which was removed for downstream analyses.

| Cultivar                   | Total DEGs (> 4 log2FoldChange) |
|----------------------------|---------------------------------|
| SunOleic                   | 4,605                           |
| SunOleic (H_Sun_7 removed) | 4,107                           |
| SunOleic (H_Sun_6 removed) | 4,082                           |
| SunOleic (H_Sun_5 removed) | 4,230                           |
| Tifguard                   | 414                             |
| Tifguard (H_Tif_1 removed) | 2,580                           |



**Table S2. SunOleic 97R Significantly Enriched GO Terms.** Complete list of all significantly enriched GO terms from all GO categories (Levels 1 - 6) found in the SunOleic 97R cultivar.

| GO ID      | GO Terms           | GO Term Description                               | Upregulation Gene Count | Downregulation Gene Count | Nonsignificant Gene Count | p-value |
|------------|--------------------|---------------------------------------------------|-------------------------|---------------------------|---------------------------|---------|
| GO:0032991 | Cellular Component | protein-containing complex                        | 96                      | 93                        | 3423                      | <0.001  |
| GO:0098796 | Cellular Component | membrane protein complex                          | 10                      | 22                        | 673                       | <0.001  |
| GO:1902494 | Cellular Component | catalytic complex                                 | 30                      | 37                        | 1047                      | <0.001  |
| GO:1990904 | Cellular Component | ribonucleoprotein complex                         | 24                      | 9                         | 1163                      | <0.001  |
| GO:0005623 | Cellular Component | cell                                              | 979                     | 486                       | 13516                     | <0.001  |
| GO:0044464 | Cellular Component | cell part                                         | 979                     | 486                       | 13516                     | <0.001  |
| GO:0044464 | Cellular Component | cell part                                         | 979                     | 486                       | 13516                     | <0.001  |
| GO:0044424 | Cellular Component | intracellular part                                | 687                     | 428                       | 12236                     | <0.001  |
| GO:0005622 | Cellular Component | intracellular                                     | 691                     | 430                       | 12266                     | <0.001  |
| GO:0031975 | Cellular Component | envelope                                          | 21                      | 24                        | 825                       | <0.001  |
| GO:0012505 | Cellular Component | endomembrane system                               | 73                      | 64                        | 1762                      | <0.001  |
| GO:0071944 | Cellular Component | cell periphery                                    | 315                     | 73                        | 1826                      | <0.001  |
| GO:0005886 | Cellular Component | plasma membrane                                   | 239                     | 58                        | 1535                      | <0.001  |
| GO:0042175 | Cellular Component | nuclear outer membrane-endoplasmic reticulum      | 12                      | 16                        | 423                       | <0.001  |
| GO:0030312 | Cellular Component | membrane network external encapsulating structure | 71                      | 13                        | 251                       | <0.001  |
| GO:0044459 | Cellular Component | plasma membrane part                              | 41                      | 6                         | 259                       | 0.023   |
| GO:0044422 | Cellular Component | organelle part                                    | 120                     | 145                       | 4440                      | <0.001  |
| GO:0044446 | Cellular Component | intracellular organelle part                      | 118                     | 145                       | 4437                      | <0.001  |
| GO:0031090 | Cellular Component | organelle membrane                                | 46                      | 42                        | 1204                      | <0.001  |
| GO:0043233 | Cellular Component | organelle lumen                                   | 22                      | 24                        | 854                       | <0.001  |
| GO:0043226 | Cellular Component | organelle                                         | 550                     | 365                       | 10228                     | <0.001  |
| GO:0043229 | Cellular Component | intracellular organelle                           | 549                     | 365                       | 10219                     | <0.001  |
| GO:0043227 | Cellular Component | membrane-bounded organelle                        | 530                     | 355                       | 9482                      | <0.001  |
| GO:0044422 | Cellular Component | organelle part                                    | 120                     | 145                       | 4440                      | <0.001  |
| GO:0043228 | Cellular Component | non-membrane-bounded organelle                    | 49                      | 34                        | 1613                      | <0.001  |
| GO:0098796 | Cellular Component | membrane protein complex                          | 10                      | 22                        | 673                       | <0.001  |
| GO:0005789 | Cellular Component | endoplasmic reticulum membrane                    | 12                      | 16                        | 423                       | <0.001  |
| GO:0044459 | Cellular Component | plasma membrane part                              | 41                      | 6                         | 259                       | 0.023   |

|            |                    |                                                        |      |     |       |        |
|------------|--------------------|--------------------------------------------------------|------|-----|-------|--------|
| GO:0031090 | Cellular Component | organelle membrane                                     | 46   | 42  | 1204  | <0.001 |
| GO:0098805 | Cellular Component | whole membrane                                         | 19   | 19  | 1204  | <0.001 |
| GO:0005886 | Cellular Component | plasma membrane                                        | 239  | 58  | 1535  | <0.001 |
| GO:0042175 | Cellular Component | nuclear outer<br>membrane-<br>endoplasmic<br>reticulum | 12   | 16  | 423   | <0.001 |
| GO:0005789 | Cellular Component | membrane network<br>endoplasmic<br>reticulum           | 12   | 16  | 423   | <0.001 |
| GO:0034357 | Cellular Component | membrane<br>photosynthetic<br>membrane                 | 5    | 18  | 481   | <0.001 |
| GO:0031974 | Cellular Component | membrane-enclosed<br>lumen                             | 22   | 24  | 854   | <0.001 |
| GO:0043233 | Cellular Component | organelle lumen                                        | 22   | 24  | 854   | <0.001 |
| GO:0005576 | Cellular Component | extracellular region                                   | 145  | 28  | 488   | <0.001 |
| GO:0048046 | Cellular Component | apoplast                                               | 40   | 13  | 113   | <0.001 |
| GO:0003824 | Molecular Function | catalytic activity                                     | 1539 | 570 | 13281 | <0.001 |
| GO:0140097 | Molecular Function | catalytic activity,<br>acting on DNA                   | 16   | 18  | 275   | 0.004  |
| GO:0016491 | Molecular Function | oxidoreductase<br>activity                             | 373  | 127 | 2466  | <0.001 |
| GO:0016874 | Molecular Function | ligase activity                                        | 33   | 20  | 688   | <0.001 |
| GO:0016829 | Molecular Function | lyase activity                                         | 82   | 28  | 577   | 0.041  |
| GO:0140098 | Molecular Function | catalytic activity,<br>acting on RNA                   | 59   | 22  | 732   | 0.043  |
| GO:0016853 | Molecular Function | isomerase activity                                     | 34   | 28  | 481   | 0.005  |
| GO:0005215 | Molecular Function | transporter activity                                   | 198  | 88  | 1692  | 0.026  |
| GO:0022857 | Molecular Function | transmembrane<br>transporter activity                  | 194  | 85  | 1660  | 0.042  |
| GO:0005488 | Molecular Function | binding                                                | 1483 | 493 | 12886 | 0.001  |
| GO:0097159 | Molecular Function | organic cyclic<br>compound binding                     | 1051 | 326 | 9202  | 0.002  |
| GO:1901363 | Molecular Function | heterocyclic<br>compound binding                       | 1048 | 326 | 9191  | 0.002  |
| GO:0097367 | Molecular Function | carbohydrate<br>derivative binding                     | 581  | 175 | 4655  | 0.001  |
| GO:0048037 | Molecular Function | cofactor binding                                       | 197  | 79  | 1444  | <0.001 |
| GO:0036094 | Molecular Function | small molecule<br>binding                              | 669  | 203 | 5439  | 0.001  |
| GO:0043167 | Molecular Function | ion binding                                            | 1032 | 361 | 8465  | <0.001 |
| GO:0005515 | Molecular Function | protein binding                                        | 159  | 57  | 1748  | 0.037  |
| GO:0030246 | Molecular Function | carbohydrate<br>binding                                | 114  | 9   | 425   | <0.001 |
| GO:0008289 | Molecular Function | lipid binding                                          | 45   | 10  | 262   | 0.013  |
| GO:0008144 | Molecular Function | drug binding                                           | 486  | 151 | 3956  | 0.009  |
| GO:0051540 | Molecular Function | metal cluster<br>binding                               | 19   | 20  | 277   | 0.003  |
| GO:0098772 | Molecular Function | molecular function<br>regulator                        | 71   | 14  | 443   | 0.004  |

|            |                    |                                           |      |     |       |        |
|------------|--------------------|-------------------------------------------|------|-----|-------|--------|
| GO:0030234 | Molecular Function | enzyme regulator activity                 | 63   | 10  | 385   | 0.002  |
| GO:0016209 | Molecular Function | antioxidant activity                      | 48   | 14  | 212   | <0.001 |
| GO:0004601 | Molecular Function | peroxidase activity                       | 46   | 11  | 163   | <0.001 |
| GO:0140110 | Molecular Function | transcription regulator activity          | 155  | 23  | 861   | <0.001 |
| GO:0003700 | Molecular Function | DNA-binding transcription factor activity | 147  | 19  | 725   | <0.001 |
| GO:0050896 | Biological Process | response to stimulus                      | 456  | 124 | 3193  | <0.001 |
| GO:0051716 | Biological Process | cellular response to stimulus             | 296  | 82  | 2165  | <0.001 |
| GO:0006950 | Biological Process | response to stress                        | 281  | 54  | 1607  | <0.001 |
| GO:0042221 | Biological Process | response to chemical                      | 166  | 41  | 1258  | 0.015  |
| GO:0009605 | Biological Process | response to external stimulus             | 77   | 8   | 321   | <0.001 |
| GO:0009987 | Biological Process | cellular process                          | 1345 | 539 | 14842 | <0.001 |
| GO:0007154 | Biological Process | cell communication                        | 269  | 49  | 1527  | <0.001 |
| GO:0051716 | Biological Process | cellular response to stimulus             | 296  | 82  | 2165  | <0.001 |
| GO:0050794 | Biological Process | regulation of cellular process            | 495  | 111 | 3681  | <0.001 |
| GO:0007165 | Biological Process | signal transduction                       | 189  | 39  | 1318  | <0.001 |
| GO:0048522 | Biological Process | positive regulation of cellular process   | 26   | 14  | 494   | 0.001  |
| GO:0044237 | Biological Process | cellular metabolic process                | 1102 | 454 | 12481 | <0.001 |
| GO:0007049 | Biological Process | cell cycle                                | 25   | 20  | 515   | <0.001 |
| GO:0048523 | Biological Process | negative regulation of cellular process   | 61   | 7   | 424   | 0.004  |
| GO:0016043 | Biological Process | cellular component organization           | 105  | 77  | 2365  | <0.001 |
| GO:0071554 | Biological Process | cell wall organization or biogenesis      | 54   | 19  | 294   | <0.001 |
| GO:1990748 | Biological Process | cellular detoxification                   | 53   | 15  | 244   | <0.001 |
| GO:0007017 | Biological Process | microtubule-based process                 | 5    | 7   | 201   | 0.002  |
| GO:0051301 | Biological Process | cell division                             | 7    | 11  | 287   | <0.001 |
| GO:0008037 | Biological Process | cell recognition                          | 74   | 6   | 144   | <0.001 |
| GO:0023052 | Biological Process | signaling                                 | 189  | 40  | 1320  | <0.001 |
| GO:0007165 | Biological Process | signal transduction                       | 189  | 39  | 1318  | <0.001 |
| GO:0065007 | Biological Process | biological regulation                     | 617  | 157 | 4721  | <0.001 |
| GO:0050789 | Biological Process | regulation of biological process          | 546  | 116 | 4061  | <0.001 |
| GO:0065009 | Biological Process | regulation of molecular function          | 67   | 11  | 522   | 0.034  |
| GO:0050789 | Biological Process | regulation of biological process          | 546  | 116 | 4061  | <0.001 |
| GO:0050794 | Biological Process | regulation of cellular process            | 495  | 111 | 3681  | <0.001 |

|            |                    |                                                |      |     |       |        |
|------------|--------------------|------------------------------------------------|------|-----|-------|--------|
| GO:0048518 | Biological Process | positive regulation of biological process      | 36   | 16  | 575   | 0.002  |
| GO:0019222 | Biological Process | regulation of metabolic process                | 339  | 67  | 2562  | <0.001 |
| GO:0048519 | Biological Process | negative regulation of biological process      | 92   | 7   | 606   | <0.001 |
| GO:0051179 | Biological Process | localization                                   | 297  | 145 | 3160  | 0.008  |
| GO:0033036 | Biological Process | macromolecule localization                     | 68   | 36  | 1170  | <0.001 |
| GO:0051234 | Biological Process | establishment of localization                  | 291  | 143 | 3069  | 0.009  |
| GO:0051641 | Biological Process | cellular localization                          | 15   | 27  | 925   | <0.001 |
| GO:0008152 | Biological Process | metabolic process                              | 1306 | 546 | 14153 | <0.001 |
| GO:0019222 | Biological Process | regulation of metabolic process                | 339  | 67  | 2562  | <0.001 |
| GO:0009893 | Biological Process | positive regulation of metabolic process       | 23   | 13  | 462   | <0.001 |
| GO:0071704 | Biological Process | organic substance metabolic process            | 1159 | 480 | 12827 | <0.001 |
| GO:0006807 | Biological Process | nitrogen compound metabolic process            | 901  | 362 | 10786 | <0.001 |
| GO:0044238 | Biological Process | primary metabolic process                      | 1035 | 453 | 12079 | <0.001 |
| GO:0044237 | Biological Process | cellular metabolic process                     | 1102 | 454 | 12481 | <0.001 |
| GO:0032259 | Biological Process | methylation                                    | 43   | 34  | 629   | 0.002  |
| GO:0009058 | Biological Process | biosynthetic process                           | 486  | 176 | 5594  | <0.001 |
| GO:0044281 | Biological Process | small molecule metabolic process               | 148  | 84  | 2309  | <0.001 |
| GO:0009892 | Biological Process | negative regulation of metabolic process       | 77   | 5   | 473   | <0.001 |
| GO:0009056 | Biological Process | catabolic process                              | 123  | 47  | 1668  | <0.001 |
| GO:0042440 | Biological Process | pigment metabolic process                      | 9    | 5   | 207   | 0.013  |
| GO:0055114 | Biological Process | oxidation-reduction process                    | 23   | 30  | 514   | <0.001 |
| GO:0019748 | Biological Process | secondary metabolic process                    | 44   | 14  | 112   | <0.001 |
| GO:0070085 | Biological Process | glycosylation                                  | 9    | 9   | 215   | 0.014  |
| GO:0042445 | Biological Process | hormone metabolic process                      | 34   | 11  | 108   | <0.001 |
| GO:0048518 | Biological Process | positive regulation of biological process      | 36   | 16  | 575   | 0.002  |
| GO:0048522 | Biological Process | positive regulation of cellular process        | 26   | 14  | 494   | 0.001  |
| GO:0009893 | Biological Process | positive regulation of metabolic process       | 23   | 13  | 462   | <0.001 |
| GO:0032502 | Biological Process | developmental process                          | 57   | 44  | 800   | 0.001  |
| GO:0048856 | Biological Process | anatomical structure development               | 52   | 39  | 724   | 0.002  |
| GO:0003006 | Biological Process | developmental process involved in reproduction | 14   | 18  | 276   | 0.001  |
| GO:0009653 | Biological Process | anatomical structure morphogenesis             | 8    | 11  | 180   | 0.012  |

|            |                    |                                                |     |    |      |        |
|------------|--------------------|------------------------------------------------|-----|----|------|--------|
| GO:0051704 | Biological Process | multi-organism process                         | 149 | 9  | 428  | <0.001 |
| GO:0044706 | Biological Process | multi-multicellular organism process           | 75  | 7  | 180  | <0.001 |
| GO:0032501 | Biological Process | multicellular organismal process               | 119 | 40 | 796  | 0.002  |
| GO:0007275 | Biological Process | multicellular organism development             | 38  | 32 | 596  | 0.001  |
| GO:0009791 | Biological Process | post-embryonic development                     | 14  | 20 | 355  | <0.001 |
| GO:0044706 | Biological Process | multi-multicellular organism process           | 75  | 7  | 180  | <0.001 |
| GO:0022414 | Biological Process | reproductive process                           | 101 | 30 | 528  | <0.001 |
| GO:0003006 | Biological Process | developmental process involved in reproduction | 14  | 18 | 276  | 0.001  |
| GO:0009856 | Biological Process | pollination                                    | 75  | 7  | 176  | <0.001 |
| GO:0009875 | Biological Process | pollen-pistil interaction                      | 74  | 6  | 145  | <0.001 |
| GO:0048544 | Biological Process | recognition of pollen                          | 74  | 6  | 144  | <0.001 |
| GO:0000003 | Biological Process | reproduction                                   | 101 | 30 | 532  | <0.001 |
| GO:0022414 | Biological Process | reproductive process                           | 101 | 30 | 528  | <0.001 |
| GO:0048519 | Biological Process | negative regulation of biological process      | 92  | 7  | 606  | <0.001 |
| GO:0048523 | Biological Process | negative regulation of cellular process        | 61  | 7  | 424  | 0.004  |
| GO:0009892 | Biological Process | negative regulation of metabolic process       | 77  | 5  | 473  | <0.001 |
| GO:0071840 | Biological Process | cellular component organization or biogenesis  | 118 | 91 | 2747 | <0.001 |
| GO:0016043 | Biological Process | cellular component organization                | 105 | 77 | 2365 | <0.001 |
| GO:0044085 | Biological Process | cellular component biogenesis                  | 50  | 34 | 1222 | <0.001 |
| GO:0098754 | Biological Process | detoxification                                 | 53  | 15 | 249  | <0.001 |
| GO:1990748 | Biological Process | cellular detoxification                        | 53  | 15 | 244  | <0.001 |

**Table S3. Tifguard Significantly Enriched GO Terms.** Complete list of all significantly enriched GO terms from all GO categories (Levels 1 - 6) found in the Tifguard cultivar.

| GO ID      | GO Terms           | GO Term Description | Upregulation Gene Count | Downregulation Gene Count | Nonsignificant Gene Count | p-value |
|------------|--------------------|---------------------|-------------------------|---------------------------|---------------------------|---------|
| GO:0005623 | Cellular Component | cell                | 655                     | 115                       | 3310                      | <0.001  |
| GO:0044464 | Cellular Component | cell part           | 655                     | 115                       | 3310                      | <0.001  |
| GO:0044464 | Cellular Component | cell part           | 655                     | 115                       | 3310                      | <0.001  |
| GO:0044424 | Cellular Component | intracellular part  | 478                     | 95                        | 2964                      | <0.001  |
| GO:0005622 | Cellular Component | intracellular       | 482                     | 95                        | 2969                      | <0.001  |
| GO:0031975 | Cellular Component | envelope            | 18                      | 7                         | 258                       | <0.001  |
| GO:0071944 | Cellular Component | cell periphery      | 192                     | 21                        | 471                       | 0.001   |

|            |                    |                                            |      |     |      |        |
|------------|--------------------|--------------------------------------------|------|-----|------|--------|
| GO:0005886 | Cellular Component | plasma membrane                            | 170  | 16  | 388  | <0.001 |
| GO:0044459 | Cellular Component | plasma membrane<br>part                    | 36   | 5   | 63   | 0.007  |
| GO:0012505 | Cellular Component | endomembrane<br>system                     | 53   | 12  | 296  | 0.001  |
| GO:0043226 | Cellular Component | organelle                                  | 372  | 85  | 2444 | <0.001 |
| GO:0043229 | Cellular Component | intracellular<br>organelle                 | 371  | 85  | 2443 | <0.001 |
| GO:0043227 | Cellular Component | membrane-<br>bounded organelle             | 354  | 79  | 2318 | <0.001 |
| GO:0044422 | Cellular Component | organelle part                             | 102  | 37  | 1134 | <0.001 |
| GO:0043228 | Cellular Component | non-membrane-<br>bounded organelle         | 32   | 9   | 363  | <0.001 |
| GO:0044422 | Cellular Component | organelle part                             | 102  | 37  | 1134 | <0.001 |
| GO:0044446 | Cellular Component | intracellular<br>organelle part            | 101  | 37  | 1134 | <0.001 |
| GO:0031090 | Cellular Component | organelle<br>membrane                      | 31   | 9   | 247  | <0.001 |
| GO:0032991 | Cellular Component | protein-containing<br>complex              | 76   | 25  | 749  | <0.001 |
| GO:0098796 | Cellular Component | membrane protein<br>complex                | 13   | 11  | 231  | <0.001 |
| GO:1902494 | Cellular Component | catalytic complex                          | 28   | 10  | 217  | <0.001 |
| GO:0031090 | Cellular Component | organelle<br>membrane                      | 31   | 9   | 247  | <0.001 |
| GO:0005886 | Cellular Component | plasma membrane                            | 170  | 16  | 388  | <0.001 |
| GO:0098805 | Cellular Component | whole membrane                             | 16   | 5   | 113  | 0.012  |
| GO:0031224 | Cellular Component | intrinsic<br>component of<br>membrane      | 763  | 116 | 2305 | 0.031  |
| GO:0098796 | Cellular Component | membrane protein<br>complex                | 13   | 11  | 231  | <0.001 |
| GO:0044459 | Cellular Component | plasma membrane<br>part                    | 36   | 5   | 63   | 0.007  |
| GO:0016787 | Molecular Function | hydrolase activity                         | 457  | 54  | 1240 | <0.001 |
| GO:0016740 | Molecular Function | transferase activity                       | 476  | 56  | 1331 | 0.001  |
| GO:0016491 | Molecular Function | oxidoreductase<br>activity                 | 191  | 44  | 798  | 0.002  |
| GO:0016829 | Molecular Function | lyase activity                             | 22   | 16  | 175  | <0.001 |
| GO:0140096 | Molecular Function | catalytic activity,<br>acting on a protein | 290  | 31  | 820  | 0.021  |
| GO:0016853 | Molecular Function | isomerase activity                         | 18   | 9   | 157  | <0.001 |
| GO:0005488 | Molecular Function | binding                                    | 1108 | 137 | 3207 | <0.001 |
| GO:0036094 | Molecular Function | small molecule<br>binding                  | 583  | 44  | 1437 | <0.001 |
| GO:0043167 | Molecular Function | ion binding                                | 788  | 98  | 2205 | <0.001 |
| GO:0097159 | Molecular Function | organic cyclic<br>compound binding         | 844  | 78  | 2269 | <0.001 |
| GO:1901363 | Molecular Function | heterocyclic<br>compound binding           | 843  | 78  | 2264 | <0.001 |
| GO:0097367 | Molecular Function | carbohydrate<br>derivative binding         | 532  | 33  | 1217 | <0.001 |
| GO:0048037 | Molecular Function | cofactor binding                           | 102  | 25  | 466  | 0.004  |

|            |                    |                                     |     |     |      |        |
|------------|--------------------|-------------------------------------|-----|-----|------|--------|
| GO:0005515 | Molecular Function | protein binding                     | 136 | 20  | 352  | 0.043  |
| GO:0030246 | Molecular Function | carbohydrate binding                | 74  | 5   | 159  | 0.004  |
| GO:0008144 | Molecular Function | drug binding                        | 422 | 28  | 999  | <0.001 |
| GO:0051641 | Biological Process | cellular localization               | 25  | 10  | 148  | 0.007  |
| GO:0065007 | Biological Process | biological regulation               | 434 | 38  | 1098 | <0.001 |
| GO:0050789 | Biological Process | regulation of biological process    | 393 | 30  | 908  | <0.001 |
| GO:0050789 | Biological Process | regulation of biological process    | 393 | 30  | 908  | <0.001 |
| GO:0050794 | Biological Process | regulation of cellular process      | 353 | 26  | 833  | <0.001 |
| GO:0019222 | Biological Process | regulation of metabolic process     | 223 | 13  | 518  | <0.001 |
| GO:0008152 | Biological Process | metabolic process                   | 908 | 150 | 3515 | <0.001 |
| GO:0019222 | Biological Process | regulation of metabolic process     | 223 | 13  | 518  | <0.001 |
| GO:0071704 | Biological Process | organic substance metabolic process | 779 | 119 | 3050 | <0.001 |
| GO:0009058 | Biological Process | biosynthetic process                | 332 | 52  | 1334 | 0.001  |
| GO:0044237 | Biological Process | cellular metabolic process          | 754 | 108 | 3110 | <0.001 |
| GO:0044238 | Biological Process | primary metabolic process           | 719 | 113 | 2805 | <0.001 |
| GO:0009056 | Biological Process | catabolic process                   | 72  | 12  | 384  | <0.001 |
| GO:0006807 | Biological Process | nitrogen compound metabolic process | 659 | 86  | 2536 | <0.001 |
| GO:0044281 | Biological Process | small molecule metabolic process    | 94  | 23  | 625  | <0.001 |
| GO:0055114 | Biological Process | oxidation-reduction process         | 17  | 8   | 149  | <0.001 |
| GO:0050896 | Biological Process | response to stimulus                | 333 | 25  | 877  | <0.001 |
| GO:0042221 | Biological Process | response to chemical                | 105 | 8   | 381  | 0.046  |
| GO:0009628 | Biological Process | response to abiotic stimulus        | 24  | 6   | 163  | 0.003  |
| GO:0051716 | Biological Process | cellular response to stimulus       | 234 | 13  | 553  | <0.001 |
| GO:0006950 | Biological Process | response to stress                  | 219 | 10  | 471  | <0.001 |
| GO:0009719 | Biological Process | response to endogenous stimulus     | 27  | 5   | 160  | 0.011  |
| GO:0009987 | Biological Process | cellular process                    | 972 | 129 | 3695 | <0.001 |
| GO:0050794 | Biological Process | regulation of cellular process      | 353 | 26  | 833  | <0.001 |
| GO:0044237 | Biological Process | cellular metabolic process          | 754 | 108 | 3110 | <0.001 |
| GO:0051716 | Biological Process | cellular response to stimulus       | 234 | 13  | 553  | <0.001 |
| GO:0016043 | Biological Process | cellular component organization     | 70  | 15  | 507  | <0.001 |
| GO:0007049 | Biological Process | cell cycle                          | 12  | 5   | 87   | 0.023  |

|            |                    |                                                |     |    |     |        |
|------------|--------------------|------------------------------------------------|-----|----|-----|--------|
| GO:0007154 | Biological Process | cell communication                             | 205 | 12 | 403 | <0.001 |
| GO:0007165 | Biological Process | signal transduction                            | 160 | 9  | 335 | <0.001 |
| GO:0032502 | Biological Process | developmental process                          | 25  | 10 | 184 | <0.001 |
| GO:0048856 | Biological Process | anatomical structure development               | 22  | 8  | 169 | <0.001 |
| GO:0003006 | Biological Process | process involved in reproduction               | 5   | 5  | 82  | <0.001 |
| GO:0007275 | Biological Process | multicellular organism development             | 17  | 6  | 140 | 0.001  |
| GO:0003006 | Biological Process | developmental process involved in reproduction | 5   | 5  | 82  | <0.001 |
| GO:0071840 | Biological Process | cellular component organization or biogenesis  | 80  | 16 | 625 | <0.001 |
| GO:0016043 | Biological Process | cellular component organization                | 70  | 15 | 507 | <0.001 |
| GO:0023052 | Biological Process | signaling                                      | 160 | 9  | 335 | <0.001 |
| GO:0007165 | Biological Process | signal transduction                            | 160 | 9  | 335 | <0.001 |

**Table S4. SunOleic 97R versus Tifguard top 7 significant Tifguard DEGs.** Top 7 genes that may be of interest for further investigation into plant defenses. There was a large difference between the two cultivars in terms of log<sub>2</sub> fold change for these 7 genes, with low expression in SunOleic 97R ( $|\log_2FC| > 4$ ) and high expression in Tifguard ( $|\log_2FC| > 18$ ).

| Sequence           | Description                                                            | GO Term                                                                                                                                                                                                                                                                          | SunOleic 97R<br>(log2FoldChange) | Tifguard<br>(log2FoldChange) | SunOleic 97R<br>(p-value) | Tifguard<br>(p-value) |
|--------------------|------------------------------------------------------------------------|----------------------------------------------------------------------------------------------------------------------------------------------------------------------------------------------------------------------------------------------------------------------------------|----------------------------------|------------------------------|---------------------------|-----------------------|
| ArahypEVm002624t15 | alpha-dioxygenase 1                                                    | P:response to oxidative stress; P:cellular oxidant detoxification; F:peroxidase activity; F:heme binding; F:dioxygenase activity                                                                                                                                                 | -0.176301354                     | 20.22017417                  | 0.552249904               | 1.83465E-08           |
| ArahypEVm016924t2  | enoyl-CoA delta isomerase 2, peroxisomal                               | P:fatty acid beta-oxidation; F:dodecenoyl-CoA delta-isomerase activity; F:enoyl-CoA hydratase activity; C:peroxisome                                                                                                                                                             | 0.277318009                      | 20.18973321                  | 0.345620788               | 2.03812E-08           |
| ArahypEVm015273t7  | probable mitochondrial import inner membrane translocase subunit TIM21 | P:protein import into mitochondrial matrix; P:seedling development; C:TIM23 mitochondrial import inner membrane translocase complex; C:integral component of membrane                                                                                                            | 0.659037124                      | 20.14649111                  | 0.060173216               | 2.36014E-08           |
| ArahypEVm004051t7  | galacturonosyltransferase 8                                            | P:G protein-coupled receptor signaling pathway; P:pectin biosynthetic process; P:cell wall organization; F:GTPase activity; F:guanyl nucleotide binding; F:G-protein beta/gamma-subunit complex binding; F:polygalacturonate 4-alpha-galacturonosyltransferase activity; C:Golgi | 1.980144987                      | 20.13297133                  | 0.428404435               | 2.27606E-08           |



|                   |                                                                                       |                                                                                                                                                                                  |             |             |             |             |
|-------------------|---------------------------------------------------------------------------------------|----------------------------------------------------------------------------------------------------------------------------------------------------------------------------------|-------------|-------------|-------------|-------------|
| ArahypEVm009157t6 | stilbene synthase<br>3-like                                                           | membrane; C:integral<br>component of membrane<br>P:biosynthetic process;<br>F:trihydroxystilbene<br>synthase activity<br>P:nucleic acid                                          | 0.683152356 | 19.94528616 | 0.727805465 | 4.42086E-08 |
| ArahypEVm017947t2 | tRNA-intron<br>endonuclease                                                           | phosphodiester bond<br>hydrolysis; F:endonuclease<br>activity; C:integral<br>component of membrane<br>P:regulation of RNA<br>splicing; P:positive<br>regulation of transcription | -0.8874339  | 19.68439819 | 0.045381553 | 1.25511E-07 |
| ArahypEVm001550t6 | pre-mRNA-<br>splicing factor<br>ATP-dependent<br>RNA helicase<br>DEAH10 isoform<br>X1 | by RNA polymerase I;<br>F:RNA binding; F:RNA<br>helicase activity; F:ATP<br>binding; C:spliceosomal<br>complex; C:nucleolus                                                      | 1.884393315 | 18.93382575 | 0.153236792 | 2.95854E-07 |

---
